# Supplementary material
Source: publisher figshare collection journal article supplement (https://diabetesjournals.figshare.com/articles/dataset/_/17433230)
Supplement: Supplementary file 1 [file 32121503]

Online -only supplemental material

## **Glutamine Regulates Skeletal Muscle Immunometabolism in Type 2 Diabetes**

Lucile Dollet<sup>1</sup>, Michael Kuefner<sup>1</sup>, Elena Caria<sup>1</sup>, David Rizo-Roca<sup>2</sup>, Logan Pendergrast<sup>2</sup>, Ahmed M. Abdelmoez<sup>2</sup>, Håkan KR Karlsson<sup>2</sup>, Emilie Dalbram<sup>3</sup>, Jonas Treebak<sup>3</sup>, Jun Harada<sup>4</sup>, Erik Näslund<sup>5</sup>, Mikael Rydén<sup>6</sup>, Juleen R. Zierath<sup>1,2</sup>, Nicolas J. Pillon<sup>1</sup>, Anna Krook<sup>1</sup>.

<sup>1</sup>Department of Physiology and Pharmacology, Integrative Physiology, Karolinska Institutet, 171 77 Stockholm, Sweden. <sup>2</sup>Department of Molecular Medicine and Surgery, Integrative, Physiology, Karolinska Institutet, 171 77, Stockholm, Sweden. <sup>3</sup>Novo Nordisk Foundation Center for Basic Metabolic Research, Faculty of Health and Medical Sciences, University of Copenhagen, Copenhagen, Denmark. <sup>4</sup>Cardiovascular-Metabolics Research Laboratories, Daiichi Sankyo Co., Ltd., Tokyo, Japan. <sup>5</sup>Division of Surgery, Department of Clinical Sciences, Danderyd Hospital, Karolinska Institutet, 182 88 Stockholm, Sweden. <sup>6</sup>Department of Medicine, Huddinge, Karolinska Institutet Stockholm Sweden

| Mouse gene      | Ensembl reference  | Human gene | Ensembl ref     | mouse_logFC | mouse_P.Value | human_logFC | human_P.Value |
|-----------------|--------------------|------------|-----------------|-------------|---------------|-------------|---------------|
| <b>Defa22</b>   | ENSMUSG00000074443 | DEFA5      | ENSG00000164816 | 0.092528    | 0.027769      | 0.140774    | 0.01513       |
| <b>Defa28</b>   | ENSMUSG00000074434 | DEFA5      | ENSG00000164816 | -0.15117    | 0.016915      | 0.140774    | 0.01513       |
| <b>Defa40</b>   | ENSMUSG00000074441 | DEFA5      | ENSG00000164816 | 0.084919    | 0.044609      | 0.140774    | 0.01513       |
| <b>Fndc1</b>    | ENSMUSG00000071984 | FNDC1      | ENSG00000164694 | -0.17304    | 0.011134      | -0.16488    | 0.022891      |
| <b>Grb10</b>    | ENSMUSG00000020176 | GRB10      | ENSG00000106070 | -0.14901    | 0.018904      | -0.15099    | 0.022287      |
| <b>Hba-a1</b>   | ENSMUSG00000069919 | HBA1       | ENSG00000206172 | -1.03272    | 0.000178      | -1.13577    | 0.000698      |
| <b>Hba-a1</b>   | ENSMUSG00000069919 | HBA2       | ENSG00000188536 | -1.03272    | 0.000178      | -1.27445    | 0.000917      |
| <b>Mrgprb2</b>  | ENSMUSG00000050425 | MRGPRX4    | ENSG00000179817 | 0.112245    | 0.036967      | 0.217329    | 0.048118      |
| <b>Ptx4</b>     | ENSMUSG00000044172 | PTX4       | ENSG00000251692 | -0.22896    | 0.000259      | -0.20994    | 0.018986      |
| <b>Rsad2</b>    | ENSMUSG00000020641 | RSAD2      | ENSG00000134321 | -0.26204    | 0.00066       | -0.12742    | 0.02321       |
| <b>Snca</b>     | ENSMUSG00000025889 | SNCA       | ENSG00000145335 | -0.18844    | 0.005769      | -0.17318    | 0.009612      |
| <b>Tas2r120</b> | ENSMUSG00000059382 | TAS2R31    | ENSG00000256436 | 0.087108    | 0.016376      | -0.19283    | 0.00415       |
| <b>Tas2r120</b> | ENSMUSG00000059382 | TAS2R19    | ENSG00000212124 | 0.087108    | 0.016376      | 0.32795     | 0.005263      |
| <b>Zfp992</b>   | ENSMUSG00000070605 | ZNF34      | ENSG00000196378 | -0.08283    | 0.032177      | 0.10602     | 0.048793      |

**Supplemental Table 1:** List of the genes commonly altered by glutamine administration in HFD fed mice ( $p < 0.05$ ) and altered in skeletal muscle of humans with high or low plasma glutamine levels ( $p < 0.05$ ). Log fold-change and adjusted p-value are indicated for both mice and human dataset.

**A**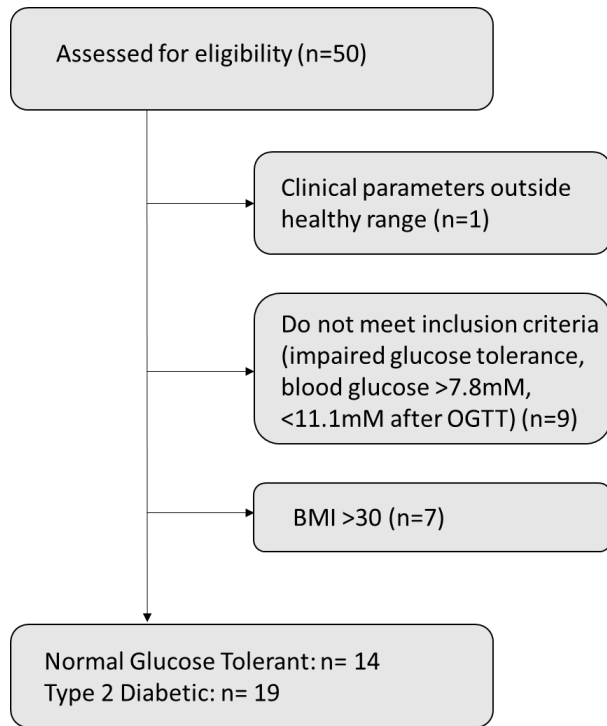**B**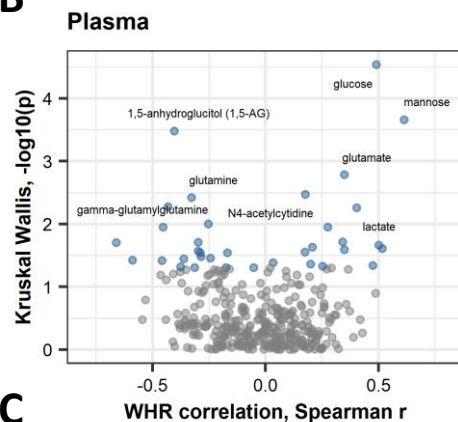**C**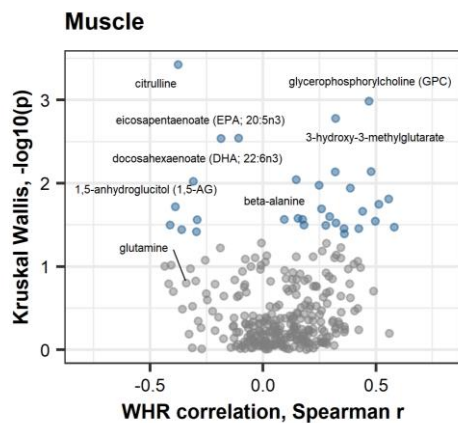**D****Plasma**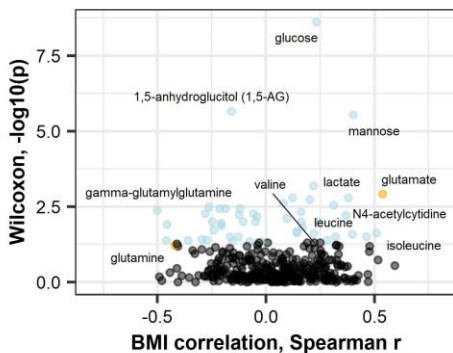**E****Plasma**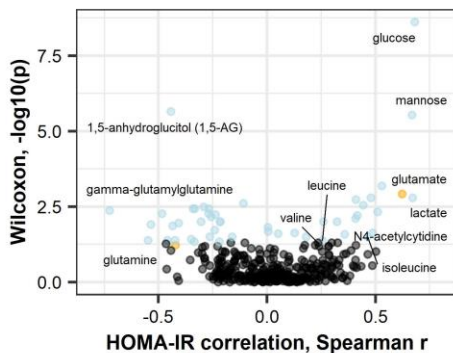**H****Plasma**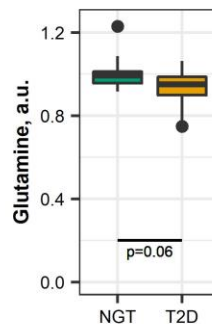**I****Plasma**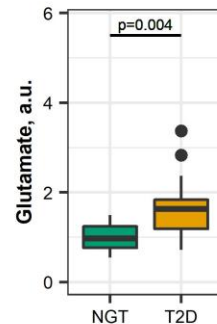**F****Muscle**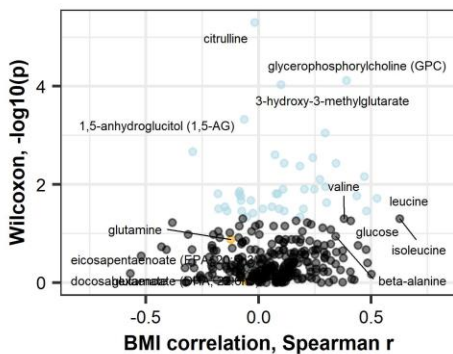**G****Muscle**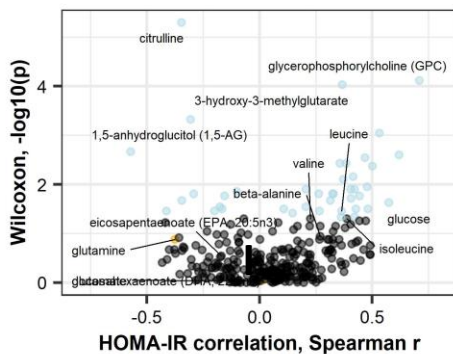**J****Muscle**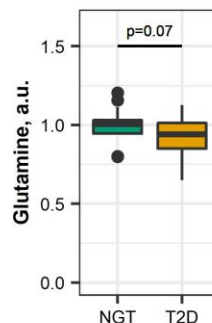**K****Muscle**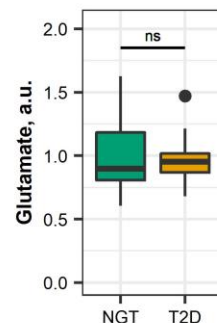

### **Supplemental Figure legends:**

**Supplemental Figure 1:** Details of the cohort recruitment and criteria for inclusion/exclusion (A). Volcano plots of metabolites in plasma (B) and skeletal muscle (C) correlating with waist/hip ratio (WHR). Spearman correlation and Wilcoxon comparison across groups. Blue color indicates significance at  $p < 0.05$ . Volcano plots of metabolites in plasma and skeletal muscle correlating with BMI and HOMA-IR (D-G). Spearman correlation and Wilcoxon comparison between NGT (lean+overweight) and T2D (lean+overweight) groups. Blue color indicates significance at  $p < 0.05$  (D-G). Plasma glutamine and glutamate levels (H-I) and skeletal muscle glutamine and glutamate levels (J-K). Mann-Whitney test between NGT and T2D groups.

**A**

 muscle    plasma
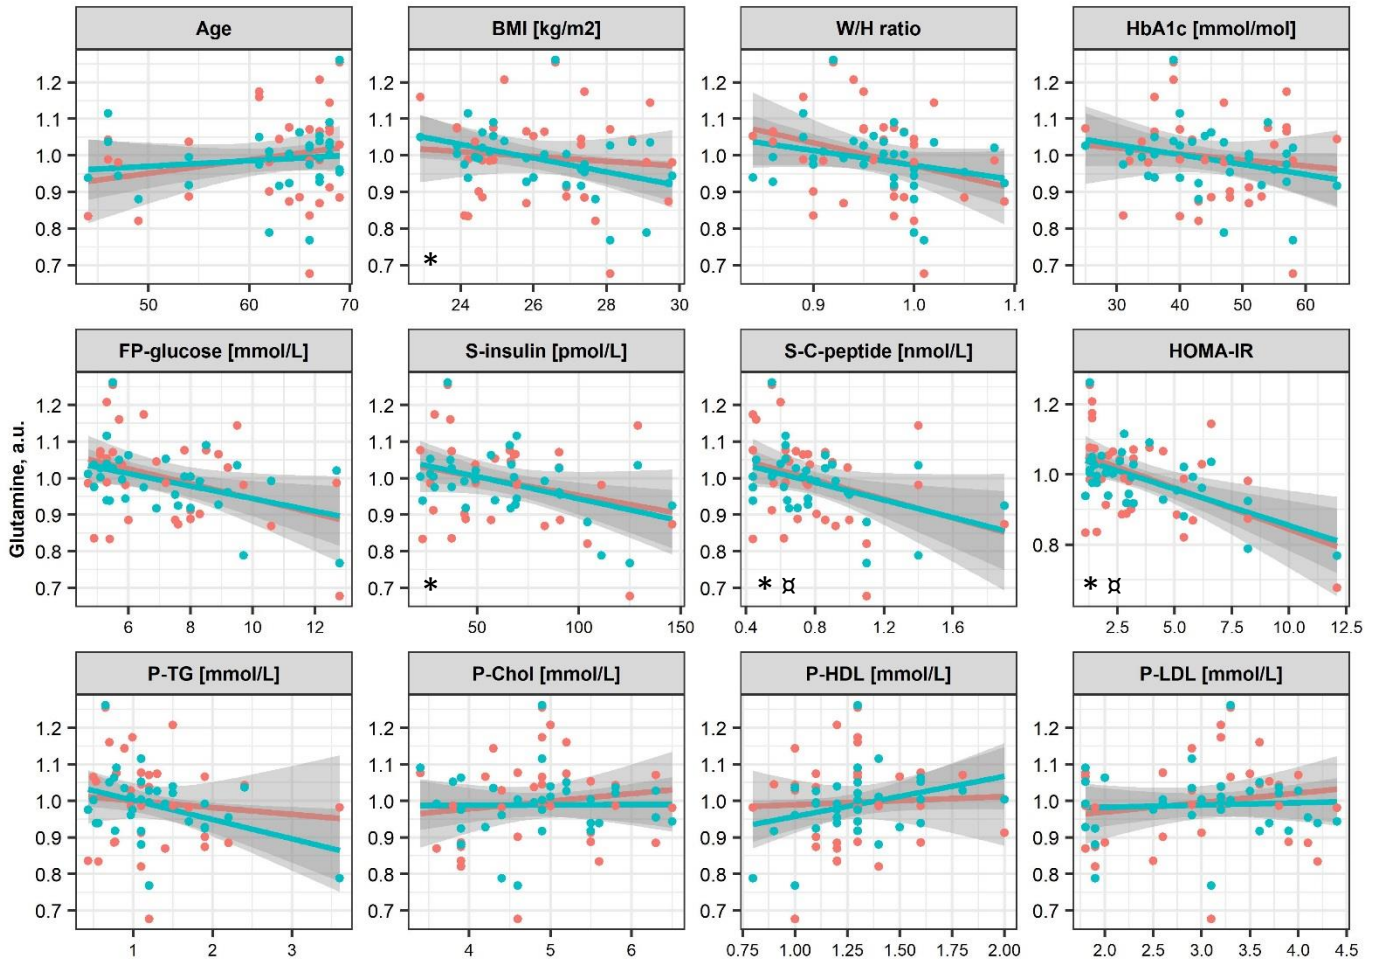**B**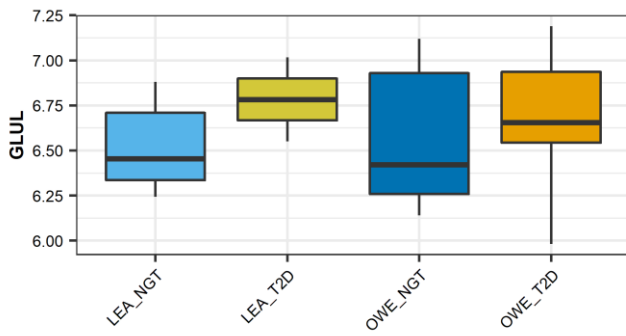**C**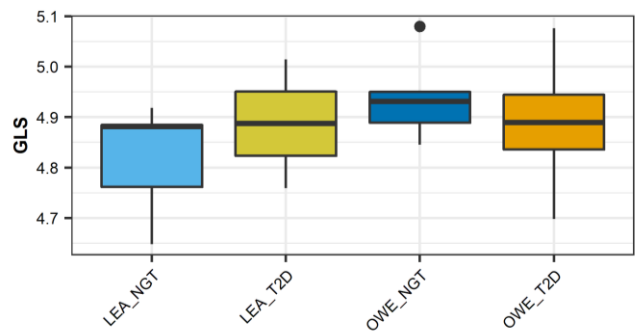

**Supplemental Figure 2:** Correlations between clinical parameters and plasma (blue) and muscle (red) glutamine level. \* $p < 0.05$  for plasma,  $\varnothing p < 0.05$  for muscle (A). *GLUL* (B) and *GLS* (C) gene expression level in human skeletal muscle.  $n = 27$ .

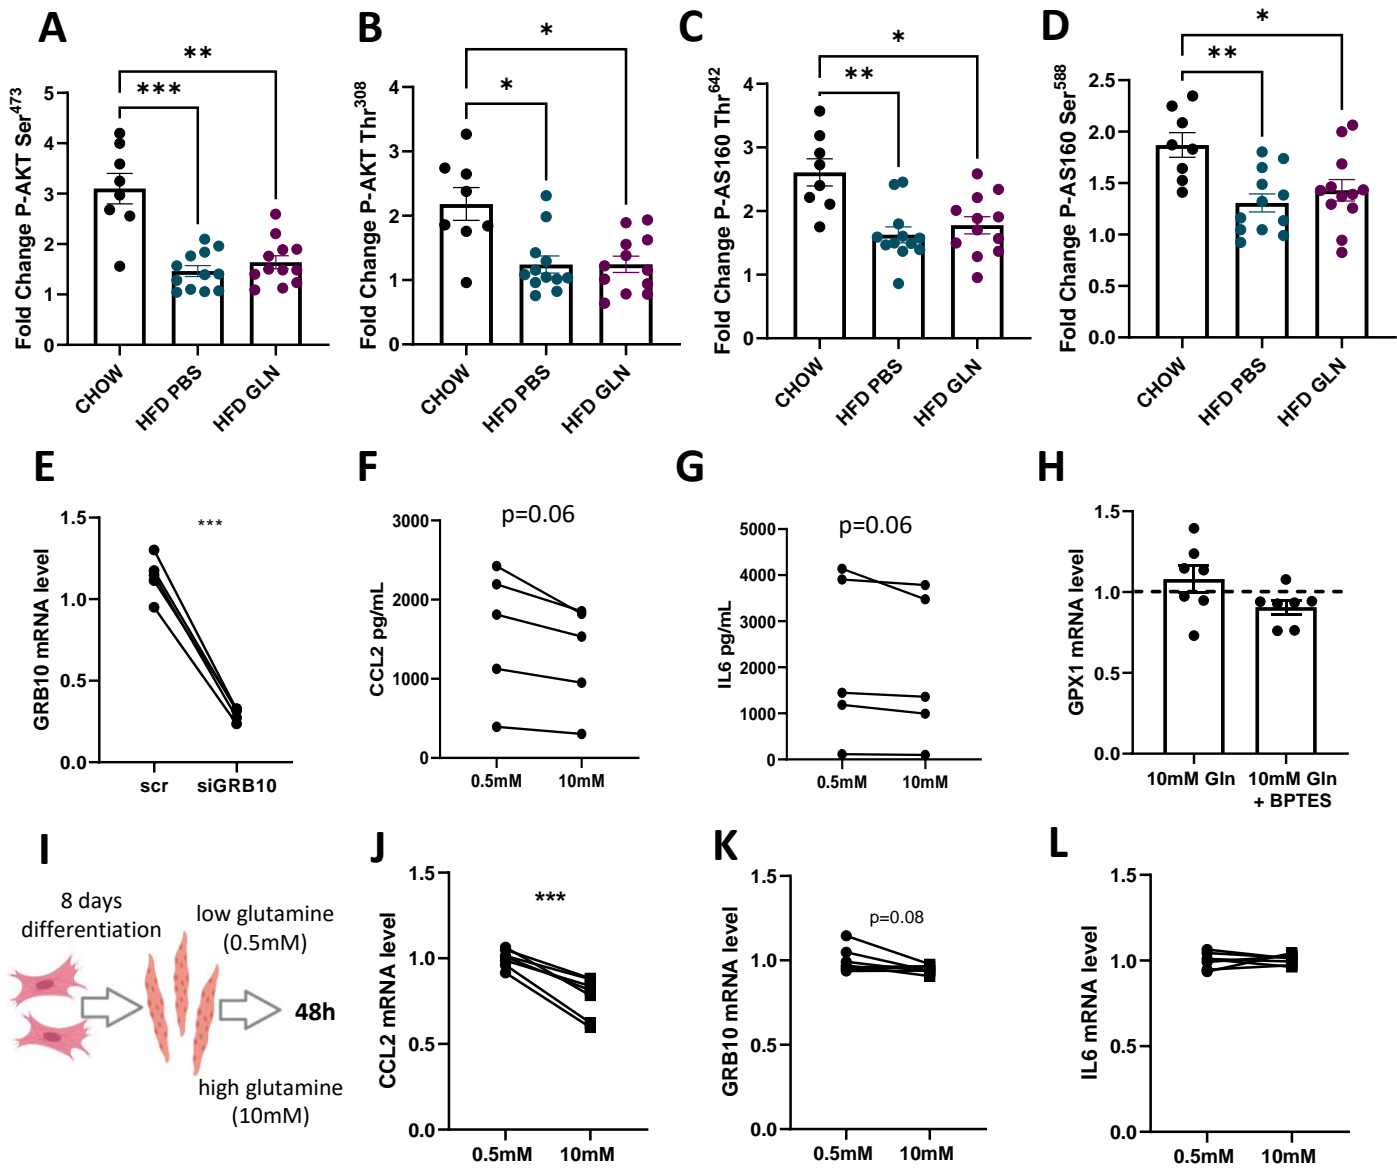

Supplemental figure 3

### Supplemental Figure 3:

Fold-change in Akt phosphorylation (P-AKT) and AS160 phosphorylation (P-AS160) in lysates of soleus skeletal muscle incubated in the absence or presence of a submaximal dose of insulin (0.36 nmol/L) for 20 min (A-D). Data are mean  $\pm$  SEM. Kruskal-Wallis test with Dunn's multiple comparison test. *GRB10* mRNA expression level in myotubes 48h after transfection using either a scramble siRNA (scr) or a siRNA targeting GRB10 (siGRB10) (E). n=5. IL6 and CCL2 content in the medium collected after 24h from skeletal muscle cells differentiated during 8 days in low (0.5 mM) or high (10 mM) (F-G). n=5. BPTES was added for 24h and *GPXI* (H) mRNA level were measured. n=7. Statistical effect was measured by paired Student's *t*-test. \*p<0.05; \*\*p<0.01; \*\*\*p<0.001. Skeletal muscle cells were differentiated during 7 days in myotubes in classical 2mM glutamine medium, and then exposed to low (0.5 mM) or high (10 mM) concentration of glutamine during 48h (I), and *CCL2* (J), *GRB10* (K) and *IL6* (L) mRNA level were measured. N=7. Statistical effect was measured by paired Student's *t*-test. \*p<0.05; \*\*p<0.01; \*\*\*p<0.001.
